# Supplementary material for: Insights into Brain Architectures from the Homological Scaffolds of Functional Connectivity Networks
Source: PubMed Central journal article supplement (PMC5099524; doi:10.3389/fnsys.2016.00085), 2016-11-08
Supplement: Image1.pdf [file Image1.pdf]

| AAL region                                | Left | Right |
|-------------------------------------------|------|-------|
| Precentral gyrus                          | 1    | 2     |
| Superior frontal gyrus, dorsolateral      | 3    | 4     |
| Superior frontal gyrus, orbital part      | 5    | 6     |
| Middle frontal gyrus                      | 7    | 8     |
| Middle frontal gyrus, orbital part        | 9    | 10    |
| Inferior frontal gyrus, opercular part    | 11   | 12    |
| Inferior frontal gyrus, triangular part   | 13   | 14    |
| Inferior frontal gyrus, orbital part      | 15   | 16    |
| Rolandic operculum                        | 17   | 18    |
| Supplementary motor area                  | 19   | 20    |
| Olfactory cortex                          | 21   | 22    |
| Superior frontal gyrus, medial            | 23   | 24    |
| Superior frontal gyrus, medial orbital    | 25   | 26    |
| Gyrus rectus                              | 27   | 28    |
| Insula                                    | 29   | 30    |
| Anterior cingulate and paracingulate gyri | 31   | 32    |
| Middle cingulate and paracingulate gyri   | 33   | 34    |
| Posterior cingulate gyrus                 | 35   | 36    |
| Hippocampus                               | 37   | 38    |
| Parahippocampal gyrus                     | 39   | 40    |
| Amygdala                                  | 41   | 42    |
| Calcarine fissure                         | 43   | 44    |
| Cuneus                                    | 45   | 46    |
| Lingual gyrus                             | 47   | 48    |
| Superior occipital gyrus                  | 49   | 50    |
| Middle occipital gyrus                    | 51   | 52    |
| Inferior occipital gyrus                  | 53   | 54    |
| Fusiform gyrus                            | 55   | 56    |
| Postcentral gyrus                         | 57   | 58    |
| Superior parietal gyrus                   | 59   | 60    |
| Inferior parietal gyri                    | 61   | 62    |
| Supramarginal gyrus                       | 63   | 64    |
| Angular gyrus                             | 65   | 66    |
| Precuneus                                 | 67   | 68    |

---

|                                        |    |    |
|----------------------------------------|----|----|
| Paracentral lobule                     | 69 | 70 |
| Caudate nucleus                        | 71 | 72 |
| Putamen (lenticular nucleus)           | 73 | 74 |
| Pallidum (lenticular nucleus)          | 75 | 76 |
| Thalamus                               | 77 | 78 |
| Heschl's gyrus                         | 79 | 80 |
| Superior temporal gyrus                | 81 | 82 |
| Temporal pole: superior temporal gyrus | 83 | 84 |
| Middle temporal gyrus                  | 85 | 86 |
| Temporal pole: middle temporal gyrus   | 87 | 88 |
| Inferior temporal gyrus                | 89 | 90 |

---
